# Supplementary material
Source: PubMed Central journal article supplement (PMC8142098)
Supplement: INC883563_Supplemental_Table1.pdf [file INC883563_Supplemental_Table1.pdf]

## Supplementary File

Supplementary Table 1 – Scored items of the UK Family satisfaction with the Intensive Care Unit questionnaire (UK FS-ICU-24)

| <b>Family satisfaction with care (FSC)</b>                |                                                                                                                                                                                                        |
|-----------------------------------------------------------|--------------------------------------------------------------------------------------------------------------------------------------------------------------------------------------------------------|
| <i>How did we treat your family member (the patient)?</i> |                                                                                                                                                                                                        |
| Q1                                                        | Concern and caring by ICU staff? The courtesy, respect and compassion your family member (the patient) was given.                                                                                      |
| Q2                                                        | Symptom management? How well the ICU staff assessed and treated your family member's symptoms - Pain                                                                                                   |
| Q3                                                        | Symptom management? How well the ICU staff assessed and treated your family member's symptoms – Breathlessness                                                                                         |
| Q4                                                        | Symptom management? How well the ICU staff assessed and treated your family member's symptoms – Agitation                                                                                              |
| <i>How did we treat you?</i>                              |                                                                                                                                                                                                        |
| Q5                                                        | Consideration of your needs? How well the ICU staff showed an interest in your needs.                                                                                                                  |
| Q6                                                        | Emotional support? How well the ICU staff provided emotional support.                                                                                                                                  |
| Q7                                                        | Concern and caring by ICU staff? The courtesy, respect and compassion you were given.                                                                                                                  |
| <i>Teamwork</i>                                           |                                                                                                                                                                                                        |
| Q8                                                        | Co-ordination of care? The teamwork of all the ICU staff who took care of your family member.                                                                                                          |
| <i>Nurses</i>                                             |                                                                                                                                                                                                        |
| Q9                                                        | Skill and competence of ICU nurses? How well the nurses cared for your family member.                                                                                                                  |
| Q10                                                       | Frequency of communication with ICU nurses? How often the nurses communicated to you about your family member's condition.                                                                             |
| <i>Doctors</i>                                            |                                                                                                                                                                                                        |
| Q11                                                       | Skill and competence of ICU doctors? How well doctors cared for your family member.                                                                                                                    |
| <i>The ICU</i>                                            |                                                                                                                                                                                                        |
| Q12                                                       | The atmosphere (mood) of the ICU was?                                                                                                                                                                  |
| <i>The waiting room</i>                                   |                                                                                                                                                                                                        |
| Q13                                                       | The atmosphere (mood) in the ICU waiting room was?                                                                                                                                                     |
| Level/amount of health care                               |                                                                                                                                                                                                        |
| Q14                                                       | Some people want everything done for their health problems while others do not want a lot done. How satisfied were you with the level or amount of health care your family member received in the ICU? |
| <b>Family satisfaction with information (FSI)</b>         |                                                                                                                                                                                                        |
| Q1                                                        | Frequency of communication with ICU doctors? How often doctors communicated to you                                                                                                                     |

|                                                                |                                                                                                                                                                            |
|----------------------------------------------------------------|----------------------------------------------------------------------------------------------------------------------------------------------------------------------------|
|                                                                | about your family member's condition.                                                                                                                                      |
| Q2                                                             | Ease of getting information? Willingness of ICU staff to answer your questions.                                                                                            |
| Q3                                                             | Understanding of information? How well ICU staff provided you with explanations that you understood.                                                                       |
| Q4                                                             | Honesty of information? The honesty of information provided to you about your family member's condition.                                                                   |
| Q5                                                             | Completeness of information? How well ICU staff informed you what was happening to your family member and why things were being done.                                      |
| Q6                                                             | Consistency of information? The consistency of information provided to you about your family member's condition (did you get a similar story from the doctor, nurse, etc.) |
| <b>Family satisfaction with decision-making process (FSDM)</b> |                                                                                                                                                                            |
| Q1                                                             | Did you feel included in the decision-making process?                                                                                                                      |
| Q2                                                             | Did you feel supported during the decision-making process?                                                                                                                 |
| Q3                                                             | Did you feel you had control over the care of your family member?                                                                                                          |
| Q4                                                             | When making decisions, did you have adequate time to have your concerns addressed and questions answered?                                                                  |
